# Supplementary material for: Potential Involvement of lncRNAs in the Modulation of the Transcriptome Response to Nodavirus Challenge in European Sea Bass (Dicentrarchus labrax L.)
Source: MDPI journal article supplement (doi:10.3390/biology9070165), 2020-07-15

**Supplementary Figure S1. Principal component analysis (PCA) of the lncRNAs in the different samples.** Each point represents a biological replicate, and different colours represent the different tissues. Samples were mainly clustered according to the tissue (head kidney or brain) with independence of the NNV infection.

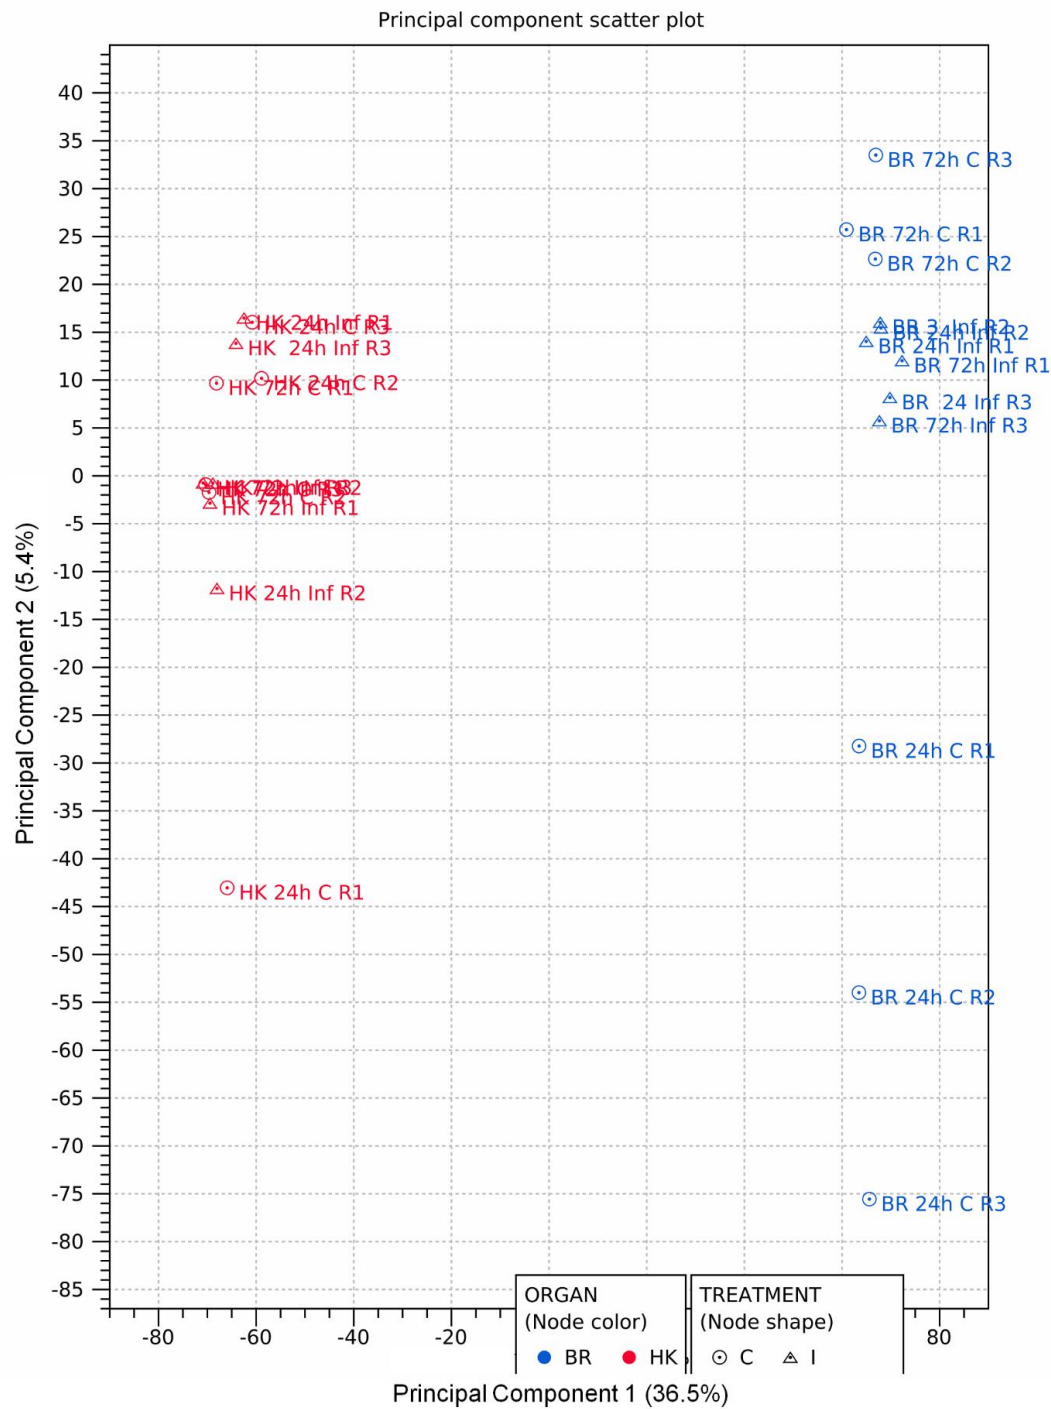

**Supplementary Figure S2. Magnitude of transcriptome modulation in the head kidney and brain after NNV infection.** (a) Fold-change values ( $FC > 2$ ,  $FDR < 0.05$ ) of the differentially expressed coding genes. (b) Fold-change values of the differentially expressed lncRNAs ( $FC > 2$ ,  $FDR < 0.05$ ). Graphs represent the individual FC values, the mean and the range.

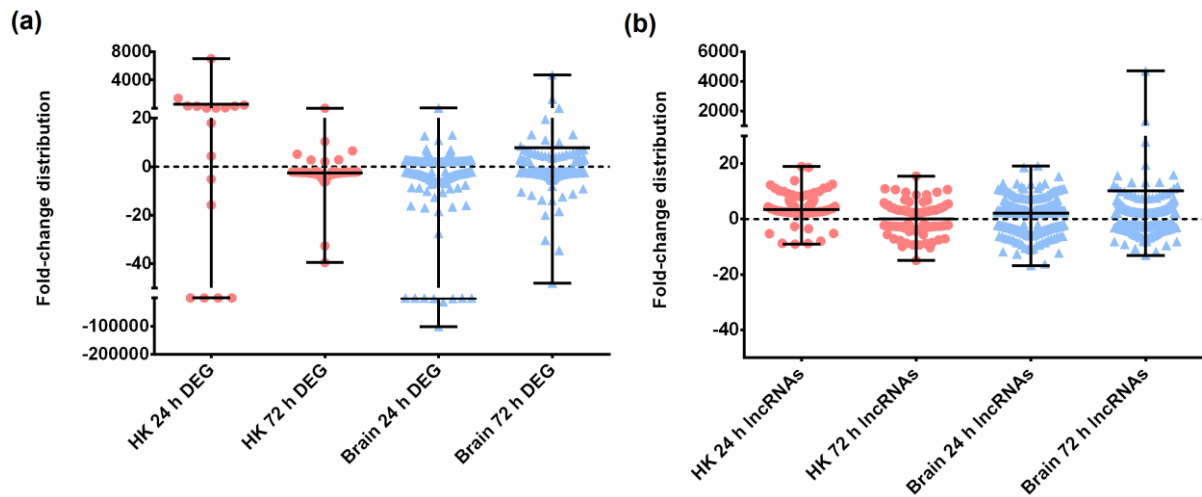

**Supplementary Figure S3. Validation of differentially expressed lncRNAs through qPCR.** Twelve potential lncRNAs were validated. Pearson's correlation test showed a value of 0.84.

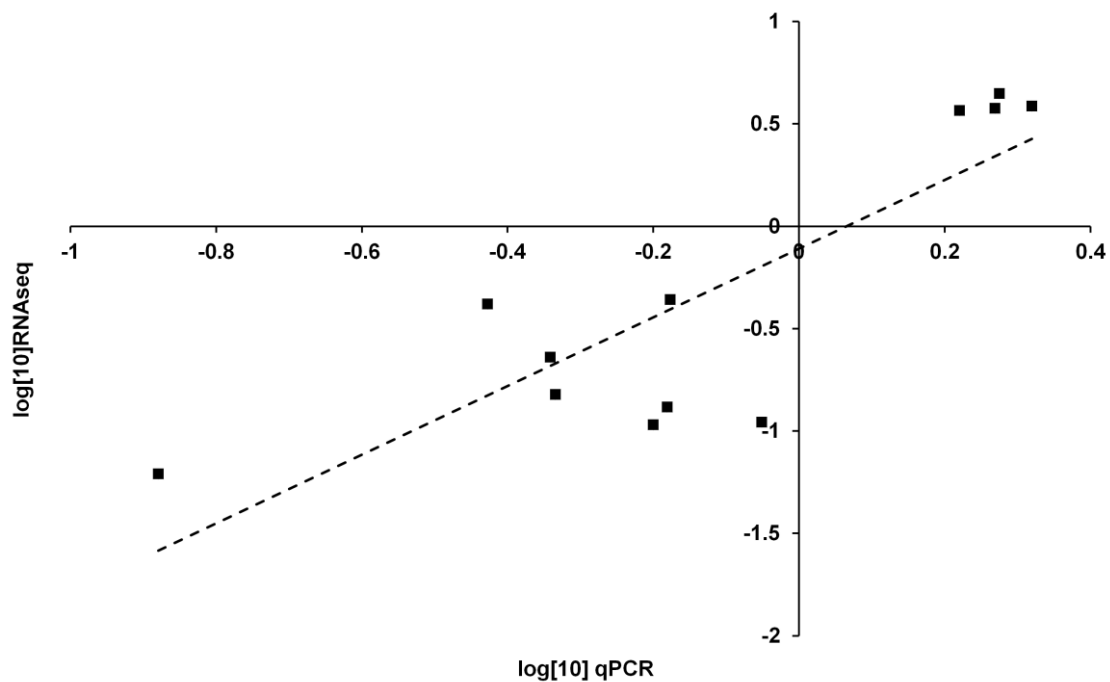

Supplement: s1 [file s1]
